# Supplementary material
Source: ML conference proceedings conference paper supplement (https://openreview.net/forum?id=sNoJSfGh6y)
Supplement: supplementary_material [file attachment]

## A MORE EXPERIMENTAL SETUP DETAILS

**Training parameters.** For training stages, we used SGD optimizer with learning rate 0.1, momentum 0.9 and weight decay  $5 \times 10^{-4}$  to train our models and all baselines with the step decay learning rate strategy. We trained all the models with 120 epochs with one NVIDIA GeForce RTX 4090 GPU, and the learning rate will decrease to 0.01 and 0.001 at epochs 60 and 110, respectively. We set the batch size as 256 for CIFAR-10 and 128 for TinyImageNet, respectively. For adversarial setting (PGD) on CIFAR-10, we set the maximum perturbations  $\epsilon$  as 0.03, the step sizes  $\alpha$  as 0.0075 and the attack step  $T$  as 10. Besides, on TinyImageNet, we set  $\epsilon$  as 0.015,  $\alpha$  as 0.00375 and  $T$  as 4.

**Evaluation.** We employ a variety of adversarial attacks to assess the performance of our proposed methods as well as compare our methods with state-of-the-art baselines: clean evaluation (NAT), white-box attacks, like Fast Gradient Sign Method (FGSM) Goodfellow et al. (2015), Momentum Iterative Method (MIM) Dong et al. (2018), Basic Iterative Method (BIM) Kurakin et al. (2018), Projected Gradient Descent (PGD) Madry et al. (2018), Carlini & Wanger Attack (C&W) Carlini & Wagner (2017), DeepFool Attack (DeepFool) Moosavi-Dezfooli et al. (2016), AutoAttack (AutoAttack) Croce & Hein (2020), Expectation over Transformation PGD (EoT-PGD) Athalye et al. (2018), adaptive PGD (APGD) Croce & Hein (2020) and SparseFool Attack (SparseFool) Modas et al. (2019); black-box attacks, such as OnePixel Attack (OnePixel) Su et al. (2019), Square Attack (Square) Andriushchenko et al. (2020), Pixel Attack (Pixel) Pomponi et al. (2022) and DI2-FGSM Attack (DI2-FGSM) Xie et al. (2019). For those that require setting the parameter of the attack strength, we uniformly set the attack strength to 0.02 for the CIFAR-10 dataset as well as 0.01 for the TinyImageNet dataset. Furthermore, we set the attack step size as 0.005 for CIFAR-10 and 0.0025 for TinyImageNet. The attack iterations of MIM, BIN and PGD are set to be 10. Due to the space limit, for a large number of other parameters of all the attacks, we follow the default setting in the TorchAttacks package Kim (2020), a PyTorch library that provides adversarial attacks to generate adversarial examples.

## B ABLATION STUDY EXPERIMENTAL RESULTS

In this appendix section, we show the results about comprehensive ablation studies: inference method, the functions of two regularizer losses, the embedding dimension of the learnable embedding input for hypernetworks, and the number of sub-models in the ensemble.

Table 4: Inference method ablation experimental results of our proposed RED and PS-RED on CIFAR-10. “AVG” means the traditional average inference strategy. Better results for every training method are highlighted in **BOLD**.

| Dataset      | Method | Inference | NAT          | FGSM         | MIM          | PGD          | AutoAttack   |
|--------------|--------|-----------|--------------|--------------|--------------|--------------|--------------|
| CIFAR-10     | RED    | AVG       | <b>91.52</b> | 57.05        | 32.40        | 28.97        | 22.63        |
|              |        | RSI       | 87.81        | <b>63.31</b> | <b>53.53</b> | <b>51.07</b> | <b>65.32</b> |
|              | PS-RED | AVG       | <b>84.29</b> | 47.20        | 28.72        | 26.67        | 18.94        |
|              |        | RSI       | 84.01        | <b>56.59</b> | <b>46.63</b> | <b>43.21</b> | <b>53.39</b> |
| TinyImageNet | RED    | AVG       | <b>60.40</b> | 32.86        | 23.50        | 21.89        | 19.29        |
|              |        | RSI       | 57.55        | <b>41.11</b> | <b>28.94</b> | <b>24.96</b> | <b>42.28</b> |
|              | PS-RED | AVG       | <b>57.98</b> | 36.68        | 18.75        | 16.35        | 14.57        |
|              |        | RSI       | 54.74        | <b>38.94</b> | <b>25.88</b> | <b>22.32</b> | <b>37.81</b> |

### B.1 INFERENCE METHOD ABLATION EXPERIMENTS

We provide the ablation experimental results to evaluate the function of the RSI strategy in Tab. 4. As seen in the table, we can see that the RSI strategy greatly improve the ensemble robustness. Especially for AutoAttack, the RED/PS-RED improve the adversarial accuracy by  $\sim 40\%$  compared

with the traditional average strategy. We attribute this increment to that the RSI strategy interrupts the coherence of generating powerful adversarial samples.

Table 5: Lipschitz regularizer ablation study results (%) of our proposed ensemble methods on CIFAR10. The best results are stressed in **BOLD**.

| Method | $\lambda_a$ | $\lambda_b$ | NAT          | FGSM         | MIM          | PGD          | AutoAttack   |
|--------|-------------|-------------|--------------|--------------|--------------|--------------|--------------|
| RED    | 0           | 10          | <b>90.69</b> | 39.27        | 16.05        | 18.57        | 29.75        |
|        | 1           | 10          | 88.76        | 49.79        | 26.08        | 31.12        | 48.73        |
|        | 10          | 10          | 87.81        | <b>63.31</b> | <b>53.53</b> | <b>51.07</b> | 65.32        |
|        | 100         | 10          | 77.20        | 59.74        | 39.49        | 42.05        | <b>66.83</b> |
| PS-RED | 0           | 10          | <b>90.47</b> | 24.08        | 1.58         | 1.93         | 8.41         |
|        | 1           | 10          | 85.76        | 39.42        | 9.87         | 13.15        | 34.66        |
|        | 10          | 10          | 84.01        | <b>56.59</b> | <b>46.63</b> | <b>43.21</b> | <b>53.39</b> |
|        | 100         | 10          | 66.52        | 32.34        | 19.06        | 29.68        | 41.09        |

## B.2 LIPSCHITZ REGULARIZER ABLATION EXPERIMENTS

For evaluating the function of the Lipschitz regularizer  $\mathcal{R}_{\text{Lipschitz}}$ , we conduct the Lipschitz regularizer ablation study with letting  $\lambda_b = 10$  (for  $\mathcal{R}_{\text{sim}}$ ). The experimental results are displayed in Tab. 5, from which it is manifest that appropriate settings of  $\lambda_a$  (for  $\mathcal{R}_{\text{Lipschitz}}$ ) assist us reach better robust performance of our proposed RED and PS-RED. Too small value of  $\lambda_a$  boosts the adversarial accuracy for the NAT evaluation, e.g., when  $\lambda_a = 0$ , the RED method achieves the best results (90.69%) under clear input. Besides, excessively large value of  $\lambda_a$  does not bring additional gains, for example, when  $\lambda_a = 100$ , the robustness is inferior to that with  $\lambda_a = 10$  against FGSM, MIM and PGD.

Table 6: Gradient similarity regularizer ablation study results (%) of our proposed ensemble methods on CIFAR10. The best results are stressed in **BOLD**.

| Method | $\lambda_a$ | $\lambda_b$ | NAT          | FGSM         | MIM          | PGD          | AutoAttack   |
|--------|-------------|-------------|--------------|--------------|--------------|--------------|--------------|
| RED    | 10          | 0           | 79.95        | 54.13        | 38.19        | 31.19        | 41.19        |
|        | 10          | 1           | 82.97        | 60.75        | 42.98        | 38.77        | 54.29        |
|        | 10          | 10          | <b>87.81</b> | <b>63.31</b> | <b>53.53</b> | <b>51.07</b> | <b>65.32</b> |
|        | 10          | 100         | 71.93        | 57.98        | 40.51        | 46.90        | 63.73        |
| PS-RED | 10          | 0           | 82.74        | 38.39        | 33.43        | 30.46        | 36.02        |
|        | 10          | 1           | <b>88.35</b> | 47.23        | 40.80        | 33.08        | 39.14        |
|        | 10          | 10          | 84.01        | <b>56.59</b> | <b>46.63</b> | <b>43.21</b> | <b>53.39</b> |
|        | 10          | 100         | 69.30        | 49.32        | 33.25        | 35.98        | 52.00        |

## B.3 GRADIENT SIMILARITY REGULARIZER ABLATION EXPERIMENTS

To assess the function of the gradient similarity regularizer  $\mathcal{R}_{\text{sim}}$ , we perform the gradient similarity regularizer ablation study with letting  $\lambda_a = 10$  (for  $\mathcal{R}_{\text{Lipschitz}}$ ), whose results are showcased in Tab. 6. According to the table, it is evident that proper assignments of  $\lambda_b$  (for  $\mathcal{R}_{\text{sim}}$ ) help us achieve better robust performance of our proposed RED and PS-RED. Too small  $\lambda_b$  significantly weakens the performance of the proposed methods, for example, when  $\lambda_b = 0$ , the robustness results of RED

and PS-RED both decrease by a great margin. Nevertheless, too large value of  $\lambda_b$  provides few gain for the ensemble robustness. Thus, we set  $\lambda_b$  as 10 for better robustness performance of our proposed methods.

#### B.4 MEMBER NUMBER ABLATION EXPERIMENTS

To evaluate the influence of the member number in the ensemble set, we provide the robustness results of our proposed methods and baselines with different ensemble members (3, 5, 8, 12). The results are shown in Tab. 7, from which we can safely conclude that for most ensemble methods, more members in the ensemble implies better adversarial robustness; for a specific number of members, our proposed RED and PS-RED demonstrate stronger ensemble robustness compared with the baselines. There is an exception, i.e., TRS, whose eight-member version is inferior to its five-member version.

Table 7: Member number ablation study results (%) of our proposed methods and baselines on CIFAR-10. The best results of every method are stressed in **BOLD**.

| Method | # of Member | NAT          | FGSM         | MIM          | PGD          | AutoAttack   |
|--------|-------------|--------------|--------------|--------------|--------------|--------------|
| GAL    | 3           | 94.24        | 18.02        | 1.42         | 0.78         | 0.00         |
|        | 5           | 94.68        | 48.43        | 6.59         | 5.72         | 1.79         |
|        | 8           | <b>95.59</b> | 57.63        | 8.71         | 5.47         | 6.29         |
|        | 12          | 95.58        | <b>58.18</b> | <b>9.49</b>  | <b>5.91</b>  | <b>7.18</b>  |
| APD    | 3           | 94.17        | 57.59        | 2.26         | 0.81         | 2.63         |
|        | 5           | 94.82        | 60.75        | 17.19        | 9.15         | 2.23         |
|        | 8           | <b>95.82</b> | 55.43        | 26.22        | 20.20        | 3.66         |
|        | 12          | 94.99        | <b>57.92</b> | <b>26.77</b> | <b>23.11</b> | <b>5.22</b>  |
| DVERGE | 3           | 92.83        | 68.55        | 18.51        | 12.85        | 20.62        |
|        | 5           | 93.28        | <b>75.73</b> | 30.02        | 26.38        | 42.14        |
|        | 8           | 92.85        | 76.52        | 37.02        | 34.06        | 50.97        |
|        | 12          | <b>93.04</b> | 69.88        | <b>46.56</b> | <b>44.40</b> | <b>53.25</b> |
| TRS    | 3           | 86.73        | 44.03        | 18.63        | 14.22        | 2.48         |
|        | 5           | 88.08        | 55.57        | 34.49        | 31.31        | <b>24.41</b> |
|        | 8           | <b>91.01</b> | 54.82        | 31.30        | 27.60        | 20.61        |
|        | 12          | 89.12        | <b>55.68</b> | <b>34.95</b> | <b>32.69</b> | 22.50        |
| RED    | 3           | 86.76        | 57.15        | 29.08        | 26.78        | 48.91        |
|        | 5           | 87.09        | 57.62        | 45.46        | 42.01        | 59.15        |
|        | 8           | 87.81        | 63.31        | 53.53        | 51.07        | 65.32        |
|        | 12          | <b>88.28</b> | <b>65.30</b> | <b>54.62</b> | <b>53.69</b> | <b>67.57</b> |
| PS-RED | 3           | 82.62        | 52.82        | 22.64        | 16.18        | 39.31        |
|        | 5           | 83.09        | 53.01        | 38.76        | 30.81        | 44.50        |
|        | 8           | 84.01        | 56.59        | 46.63        | 43.21        | 53.39        |
|        | 12          | <b>85.93</b> | <b>57.41</b> | <b>48.44</b> | <b>46.60</b> | <b>55.85</b> |

#### B.5 EMBEDDING DIMENSION ABLATION EXPERIMENTS

The original ensemble models (i.e., GAL, ADP, DVERGE, TRS and RED) contain 89,392,208 and 33,837,336 parameters for 8-sub-model CIFAR-10 ensemble and 3-sub-model TinyImageNet en-

semble, respectively; while the parameter-efficient PS-RED methods (128 embedding dimension) respectively include 9,528,400 and 3,865,560 parameters, saving approximately 90% of the parameters. To explore the effect of parameter savings and robustness performance of the PS-RED method, we conduct an ablation study on the hypernetworks input embedding. The experimental results are depicted in Tab. 8. Note that we compare the number of parameters between the original ensemble models (i.e., GAL, ADP, DVERGE, TRS and RED) and the PS-RED model with a specific embedding dimension (like 32, 64, 128 and 256). As listed in the table, there exists a trade-off between the embedding dimension and the robustness performance: normally, larger embedding dimension provides better robustness, which is probably because larger embedding dimension of the input embeddings can enhance the representational capacity of hypernetworks, thus improving the adversarial robustness. Nonetheless, a higher embedding dimension implies a need for more storage space in PS-RED models. To illustrate, the number of parameters with the embedding dimension of 256 is more than 39 times as that with the embedding dimension of 32. In addition, too large dimension does not generate too many extra profits. As a example, the parameter count with the embedding dimension of 256 is approximately three times greater than that with the embedding dimension of 128, while the robustness only improves about 3% and 2% for the MIM and PGD evaluations, respectively. Thus, the selection of hypernetworks input embedding dimension requires a multifaceted trade-off and consideration.

Table 8: Hypernetworks’ input embedding dimension ablation study results (%) of the proposed PS-RED method on CIFAR10.

| Embed. | # of Para. | Para. Saving | NAT   | FGSM  | MIM   | PGD   | AutoAttack |
|--------|------------|--------------|-------|-------|-------|-------|------------|
| 32     | 911,440    | ↓98.98%      | 70.55 | 51.84 | 25.04 | 19.59 | 45.42      |
| 64     | 2,735,184  | ↓96.94%      | 83.86 | 58.19 | 32.88 | 29.01 | 46.48      |
| 128    | 9,528,400  | ↓89.34%      | 84.01 | 56.59 | 46.63 | 43.21 | 53.39      |
| 256    | 35,697,744 | ↓60.07%      | 90.53 | 61.76 | 49.41 | 45.55 | 57.94      |

## C MORE ANALYTICAL EXPERIMENTAL RESULTS

We conducted a more in-depth analysis of our proposed RED and PS-RED from various aspects: multiple execution and comparison with latest random ensemble methods. These further experiments assist readers gain a deeper insight into the proposed ensemble methods.

Table 9: Accuracy means and standard deviations (%) of our methods and baselines on CIFAR-10 under multiple executions. The best results are highlighted in **BOLD**, and the second-best results are underlined.

| Method | NAT               | FGSM              | MIM               | BIM               | PGD               | C&W               | DeepFool          | AutoAttack        |
|--------|-------------------|-------------------|-------------------|-------------------|-------------------|-------------------|-------------------|-------------------|
| GAL    | <b>94.64±1.16</b> | 57.12±0.79        | 8.83±0.25         | 6.19±0.40         | 5.27±0.31         | <u>93.39±4.23</u> | 17.24±1.49        | 6.32±0.29         |
| ADP    | <u>93.60±2.25</u> | 56.21±1.22        | 25.55±0.70        | 22.42±0.93        | 19.63±0.57        | <b>94.35±3.82</b> | 4.66±0.36         | 4.09±0.70         |
| DVERGE | 92.19±1.01        | <b>75.42±2.12</b> | 37.57±0.58        | 35.71±0.69        | 33.04±1.05        | 93.04±1.18        | 39.20±0.75        | 50.45±1.02        |
| TRS    | 91.25±1.23        | 55.06±0.37        | 30.88±0.53        | 28.48±1.21        | 27.11±0.71        | 90.89±2.02        | 7.71±1.62         | 20.52±0.99        |
| RED    | 88.33±2.31        | <u>62.21±1.24</u> | <b>54.58±1.29</b> | <b>52.73±1.47</b> | <b>50.50±0.67</b> | 87.54±2.59        | <b>52.72±2.33</b> | <b>64.48±1.11</b> |
| PS-RED | 82.47±2.83        | 54.30±2.77        | <u>45.81±1.82</u> | <u>44.49±1.18</u> | <u>41.61±1.89</u> | 82.04±3.51        | <u>49.33±0.24</u> | <u>52.68±0.71</u> |

### C.1 MULTIPLE EXECUTION EXPERIMENTS

Our ensemble methods include a random module (RSI), whose performance may be influenced by different execution environments. To eliminate the environmental variance and get a stable robustness evaluation, we run our proposed RED as well as PS-RED multiple times (five times). The means and standard deviations are shown in Tab. 9, in which we used the different machine random seed for the multi-execution results. As indicated in the table, it is clear that our proposed methods can obtain stable robustness results that are consistently close to the robustness results in Tab. 1. Additionally, we also conduct multi-execution comparative experiments of the corresponding coun-

terparts, as illustrated in Tab. 9. The comparison results reveal that our proposed RED and PS-RED excel over the baselines with a stable and noticeable robustness increments.

## C.2 LATEST RANDOM ENSEMBLE METHOD COMPARISON

Cai *et al.* Cai et al. (2023) presented the random gated networks and ensemble-in-one (EIO) method to boost ensemble robustness, achieving state-of-the-art ensemble robustness. We compared our proposed methods with theirs. We used the default setting with their published code and train 3-path and 8-path EIO super-nets. For fair comparison, we trained 3-member and 8-member RED and PS-RED ensemble models. Results against white-box attacks are showcased in Tab. 10. The table clearly demonstrates that our approach achieves a similar clean accuracy compared to EIO. However, our method’s robustness significantly surpasses EIO’s, particularly for the 8-member/path model. We believe EIO’s deficiency stems from inadequate training as the number of paths increases, coupled with a lack of explicit constraints to ensure diversity in adversarial transferability across paths. Within EIO’s framework, only one path is trained per step, which compounds the training challenge with an increased number of paths. Furthermore, despite utilizing distilled adversarial examples to enhance the diversity of each path’s vulnerability, it is challenging to sample all paths adequately to improve their collective vulnerability diversity due to the sheer number of potential paths. In addition, we have presented experimental outcomes that incorporate adversarial training. For models with 3 members or paths, the EIO framework, when enhanced with adversarial training, exhibits superior robustness in comparison to our RED and PS-RED approaches. However, as previously discussed, an increased number of paths does not necessarily translate to enhanced robustness. On the contrary, our methods with 8 members demonstrate improved robustness over both the 8-path-EIO and the 3-path-EIO models. This suggests that while adversarial training can bolster EIO’s performance with a smaller number of paths, our approach is more effective in achieving robustness with a larger number of members or paths.

Table 10: Comparison Robust experimental results (%) of our proposed RED and PS-RED with the latest EIO on CIFAR-10. The best results of every setting are stressed in **BOLD**.

| Member/Path | Method               | NAT          | FGSM         | MIM          | PGD          | AutoAttack   |
|-------------|----------------------|--------------|--------------|--------------|--------------|--------------|
| 3           | EIO                  | <b>87.22</b> | 20.29        | 7.12         | 5.81         | 3.78         |
|             | RED                  | 86.76        | <b>57.15</b> | <b>29.08</b> | <b>26.78</b> | <b>48.91</b> |
|             | PS-RED               | 82.62        | 52.82        | 22.64        | 16.18        | 39.31        |
|             | EIO+adv. training    | <b>82.00</b> | <b>55.12</b> | <b>51.49</b> | <b>50.77</b> | 48.29        |
|             | RED+adv. training    | 78.53        | 51.68        | 45.98        | 44.34        | <b>52.12</b> |
|             | PS-RED+adv. training | 76.01        | 48.43        | 40.20        | 38.92        | 44.78        |
| 8           | EIO                  | 86.52        | 18.87        | 7.40         | 6.29         | 4.41         |
|             | RED                  | <b>87.81</b> | <b>63.31</b> | <b>53.53</b> | <b>51.07</b> | <b>65.32</b> |
|             | PS-RED               | 84.01        | 56.59        | 46.63        | 43.21        | 53.39        |
|             | EIO+adv. training    | <b>81.18</b> | 54.46        | 50.14        | 49.32        | 45.39        |
|             | RED+adv. training    | 77.99        | <b>68.21</b> | <b>65.06</b> | <b>61.12</b> | <b>71.62</b> |
|             | PS-RED+adv. training | 68.84        | 62.83        | 48.57        | 46.37        | 56.13        |

## D LOSS LANDSCAPES OF PROPOSED AND BASELINE METHODS

In this appendix section, we used the the neural network visualization tool provided by Li et al. (2018) to visualize the loss landscapes of our proposed methods and counterparts in Figs. 4 and 5.

1026  
 1027  
 1028  
 1029  
 1030  
 1031  
 1032  
 1033  
 1034  
 1035  
 1036  
 1037  
 1038  
 1039  
 1040  
 1041  
 1042  
 1043  
 1044  
 1045  
 1046  
 1047  
 1048  
 1049  
 1050  
 1051  
 1052  
 1053  
 1054  
 1055  
 1056  
 1057  
 1058  
 1059  
 1060  
 1061  
 1062  
 1063  
 1064  
 1065  
 1066  
 1067  
 1068  
 1069  
 1070  
 1071  
 1072  
 1073  
 1074  
 1075  
 1076  
 1077  
 1078  
 1079

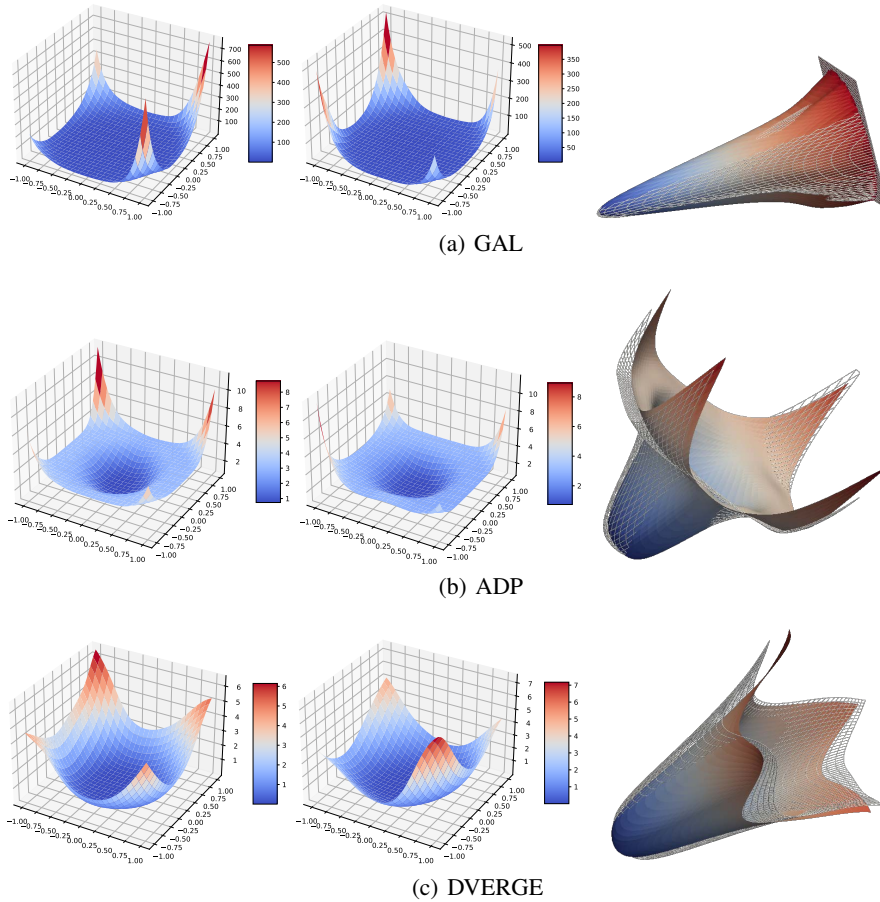

Figure 4: Loss landscapes with different training methods (GAL, ADP, DVERGE). The left and middle ones are the loss landscapes of two sub-models; the right one is the corresponding 3D surface of both models.

1080  
 1081  
 1082  
 1083  
 1084  
 1085  
 1086  
 1087  
 1088  
 1089  
 1090  
 1091  
 1092  
 1093  
 1094  
 1095  
 1096  
 1097  
 1098  
 1099  
 1100  
 1101  
 1102  
 1103  
 1104  
 1105  
 1106  
 1107  
 1108  
 1109  
 1110  
 1111  
 1112  
 1113  
 1114  
 1115  
 1116  
 1117  
 1118  
 1119  
 1120  
 1121  
 1122  
 1123  
 1124  
 1125  
 1126  
 1127  
 1128  
 1129  
 1130  
 1131  
 1132  
 1133

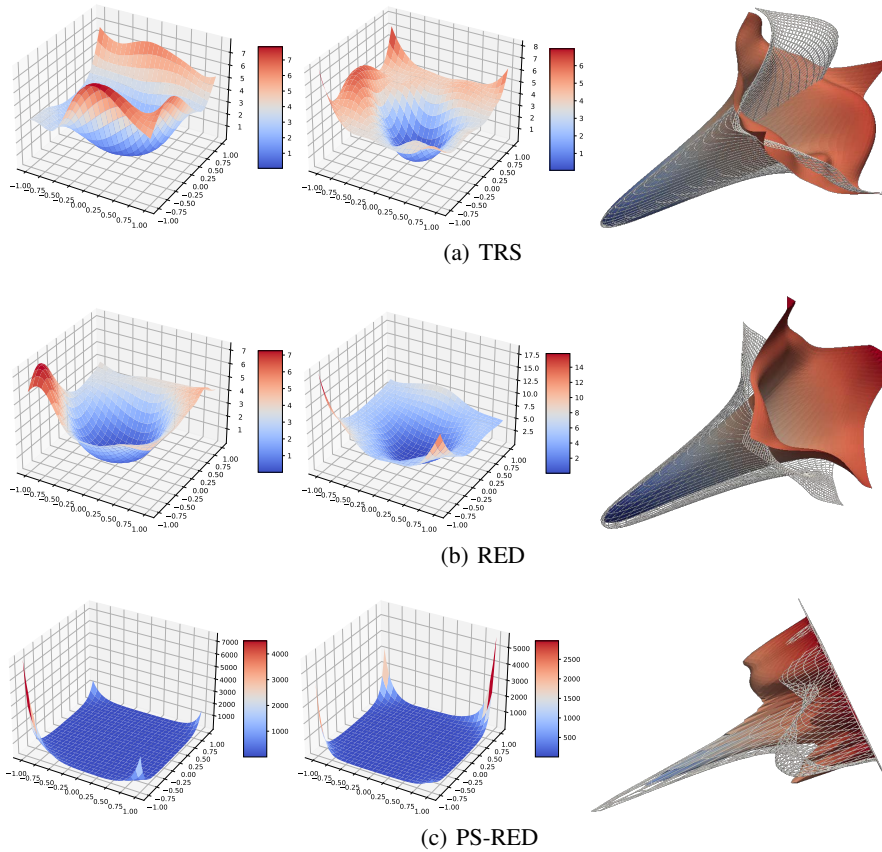

Figure 5: Loss landscapes with different training methods (TRS, RED, PS-RED). The left and middle ones are the loss landscapes of two sub-models; the right one is the corresponding 3D surface of both models.
